# Supplementary material
Source: PubMed Central journal article supplement (PMC3970219)
Supplement: NIHMS560025-supplement-1.pdf [file NIHMS560025-supplement-1.pdf]

# **Distribution, recognition and regulation of non-CpG methylation in the adult mammalian brain**

Junjie U. Guo, Yijing Su, Joo Heon Shin, Jaehoon Shin, Hongda Li, Bin Xie, Chun Zhong, Shaohu Hu, Thuc Le, Guoping Fan, Heng Zhu, Qiang Chang, Yuan Gao, Guo-li Ming and Hongjun Song

## **Supplementary Information**

### **Contents:**

Supplementary Table 1-2  
Supplementary Figures 1-14

**Supplementary Table 1. Primer sequences used in this study.**

| <b>a. Quantitative PCR (FspEI digestion)</b>  |                                 |
|-----------------------------------------------|---------------------------------|
| Car10 (Forward)                               | GGAAATATGAGGGAGACATTAG          |
| Car10 (Reverse)                               | CCACTTCCTTTCCCAAGTATC           |
| Lrba (Forward)                                | GAGCTTTACAAACAATTTCTTATC        |
| Lrba (Reverse)                                | GTTCTCTCGTGGTTTTCTTTTC          |
| Ptprt (Forward)                               | CACAGAACAAGCTCAGAAGCAC          |
| Ptprt (Reverse)                               | TCACCCATCTGATTTCAAGTCC          |
| Slmo1 (Forward)                               | GCAGGACTGTGCTCACTCAA            |
| Slmo1 (Reverse)                               | GAGGCGTTCACCTTCTTAGC            |
| Phf17 (Forward)                               | CTGTATCTCAGTGTATAGGCC           |
| Phf17 (Reverse)                               | GAATTATAGAGAAAGGGGTAAC          |
| Lgr6 (Forward)                                | AGGTGGGGACAGAGCAATG             |
| Lgr6 (Reverse)                                | GTTGGGAAAGCTTCCTAGCG            |
| <b>b. Sanger bisulfite sequencing (mouse)</b> |                                 |
| mFzd3 (+) (Forward)                           | GTGGAGTAGGGATGAAGTTAGGAAA       |
| mFzd3 (+) (Reverse)                           | CAACAATCATTATAAAATTAATAAAACCCA  |
| mSox6 (+) (Forward)                           | AAGTTTGGTTAAGGGATTGAGGTAGG      |
| mSox6 (+) (Reverse)                           | CTTTCACATCCTAAACATCCATAAAAATTC  |
| mOpcml (+) (Forward)                          | GGGTTGGGGTTATAGGTTATTATGTTG     |
| mOpcml (+) (Reverse)                          | ACCAAAAAACAATTCCCATTCTTC        |
| mC1ql1 (+) (Forward)                          | TTTTGGAATTAAGAATTAGGTGTT        |
| mC1ql1 (+) (Reverse)                          | TAAAACCAAAAAACCCACATAAAAA       |
| mLrba (+) (Forward)                           | TTTTTGTTTTGGAATTATGTGGAAT       |
| mLrba (+) (Reverse)                           | CAAAAAAACTTAAAACTACAACCTCCT     |
| mFzd3 (-) (Forward)                           | TGAATTTTTATTTTTATTTATTTAAAGAT   |
| mFzd3 (-) (Reverse)                           | CAACAAATTCTACTATAAATTCTTCATATC  |
| mSox6 (-) (Forward)                           | TGTATGGTTATGAAGTTTTTTATTTGTTGT  |
| mSox6 (-) (Reverse)                           | AATATAATTTCCCAATATCCAATATCCTA   |
| mOpcml (-) (Forward)                          | AATTTTGGTTGTATTGTGGATGTTT       |
| mOpcml (-) (Reverse)                          | TCAAACCTCAAATTTATCTTATCTTCAACTC |
| mC1ql1 (-) (Forward)                          | AGGAAAGGAAAGGAAAGGAAAGAAG       |
| mC1ql1 (-) (Reverse)                          | CCAAACCTCCAATACCTCCTCTAA        |
| mBdnf IV (+) (Forward)                        | GTGAATTTGTTAGGATTGGAAGTGAAAATA  |
| mBdnf IV (+) (Reverse)                        | TTACCCACTACTCAAATCACACC         |
| mFgf1B (+) (Forward)                          | TTTTGTTGATGAGTAAGGGTTAAGG       |
| mFgf1B (+) (Reverse)                          | CAAACCTAAAAACTCTCTTCACTCCA      |
| mHdac4 (+) (Forward)                          | TTAGGAAGTAGGAGTGGATGGGTTG       |
| mHdac4 (+) (Reverse)                          | CTCACTAAAAAATTAATACTTTCTTCATCA  |
| mMegf11 (+) (Forward)                         | ATGTGTAGATATGTGAGGGTATTAGGTATT  |
| mMegf11 (+) (Reverse)                         | CTAAACAAACCAAAAAACAAACC         |
| mBai3 (+) (Forward)                           | AATGAAAGTAATAGGAGTTAGGGGG       |
| mBai3 (+) (Reverse)                           | ACCCAATTCATAATTAATAAAACATCTT    |
| mSamd4 (+) (Forward)                          | TGAGTGTTATATTTATAAATAGTTGAAGGT  |
| mSamd4 (+) (Reverse)                          | AAATATACCTCAAAAAACAAACATAATT    |

| <b>c. Sanger bisulfite sequencing (human)</b> |                                |
|-----------------------------------------------|--------------------------------|
| hC1QL1 (-) (Forward)                          | TGAGGTAGAAGAATGGTTGGAATTTG     |
| hC1QL1 (-) (Reverse)                          | AACCTACCCAACAACCCCTAACATC      |
| hOPCML (-) (Forward)                          | TTTAGTGGAGTTGTTTTGGTGTGG       |
| hOPCML (-) (Reverse)                          | CCCAAATATATATAATCCCTCTCTCCTTA  |
| hLRBA (-) (Forward)                           | TTATGATTGAAATGTTTGAAAATGTATTAG |
| hLRBA (-) (Reverse)                           | AACACTACAAAAACATAAATATCCTCATT  |
| hSOX6 (+) (Forward)                           | AAGTTTTGTTGGGTTTTGGGTAT        |
| hSOX6 (+) (Reverse)                           | AACATATAAAAAACAAATTCACC        |
| <b>d. Quantitative PCR (gene expression)</b>  |                                |
| Dnmt1 (Forward)                               | AAGAATGGTGTGTCTACCGAC          |
| Dnmt1 (Reverse)                               | CATCCAGGTTGCTCCCCTTG           |
| Dnmt3a (Forward)                              | TACATCAGCAAACGGAAACG           |
| Dnmt3a (Reverse)                              | AGACTCTCCAGAGGCCTGGT           |
| Actb (Forward)                                | TAGGCACCAGGGTGTGATGG           |
| Actb (Reverse)                                | CATGGCTGGGGTGTGAAGG            |
| C1ql1(Forward)                                | ATCAGCACGGCCACCTATAC           |
| C1ql1(Reverse)                                | CGCATCGTAGTTGTTGCCTA           |
| Fzd3(Forward)                                 | GAAGCAAAGCAGGGAGTGTC           |
| Fzd3(Reverse)                                 | ATGGCTGCCGTGAGGTAGTCT          |
| Lrba(Forward)                                 | GCAAGAAAACACACCAGCAGA          |
| Lrba(Reverse)                                 | GGAAGAAGCGACAGACAGACC          |
| BDNF IV(Forward)                              | CAGGAGTACATATCGGCCACC          |
| BDNF IV(Reverse)                              | TGGTCATCACTCTTCTCACCTG         |
| BDNF IX(Forward)                              | GCAGCTGGAGTGGATCAGTAA          |
| BDNF IX(Reverse)                              | TGGTCATCACTCTTCTCACCTG         |
| Fgf1B (Forward)                               | GAGAGGCAGCTTCAGTCCAG           |
| Fgf1B (Reverse)                               | TCACAAGACGGGAATGAAGTC          |

| e. Primers for Dnmt3a ChIP-qPCR |                         |
|---------------------------------|-------------------------|
| Car10 (forward)                 | TGAAACCCATTATTTTTGTATGC |
| Car10 (reverse)                 | GTCCAGTCGCTATTTGTCCA    |
| Fzd3 (forward)                  | TGCTGCTTTATCAGCCTTTACTT |
| Fzd3 (reverse)                  | TTCCAAGGCCTGATGTCTCT    |
| Lrba (forward)                  | GCTGAAAGCTGCACCACTCT    |
| Lrba (reverse)                  | GTCTTCTAGGAGGGGCAA      |
| Opcml (forward)                 | TCCACAGGTTGAGCATTTCA    |
| Opcml (reverse)                 | TTTGAATCTTCCACCAGCTTC   |
| Sox6 (forward)                  | TGGTCTCATTTTCGTCATTTCA  |
| Sox6 (reverse)                  | GCTTCCAATTGCTTATGCTTTC  |
| Actb (forward)                  | CATGGTGTCCGTTCTGAGTG    |
| Actb (reverse)                  | CAGCTTCTTTGCAGCTCCTT    |
| Mapk (forward)                  | GAGACTCCGCCCTCTCTACC    |
| Mapk (reverse)                  | AATTAACCGCCGGTAGAACC    |
| Tubb2a (forward)                | GGATGGGACTACCTCATCCA    |
| Tubb2a (reverse)                | CTCCACCCCTTCTACAACCA    |
| Ubb (forward)                   | CCACCTCAAGCAGGAAACAT    |
| Ubb (reverse)                   | TTCTCGGGCAGTTTAACGTC    |
| Ubc (forward)                   | CGAAAGCGACAGGCTAAAAC    |
| Ubc (reverse)                   | CACACAAAGCCCCTCAATCT    |

**Supplementary Table 2. Protein-DNA interaction data sources.**

| <b>Protein</b> | <b>Accession</b> | <b>Reference</b>                                       |
|----------------|------------------|--------------------------------------------------------|
| CBP            | GSE21161         | Kim et al., <i>Nature</i> (2010)                       |
| CREB           | GSE21161         | Kim et al., <i>Nature</i> (2010)                       |
| NPAS4          | GSE21161         | Kim et al., <i>Nature</i> (2010)                       |
| POL2           | GSE21161         | Kim et al., <i>Nature</i> (2010)                       |
| SRF            | GSE21161         | Kim et al., <i>Nature</i> (2010)                       |
| CTCF           | wgEncodeEM001690 | ENCODE Project Consortium et al., <i>Nature</i> (2012) |
| MeCP2          | GSE19786         | Skene et al., <i>Mol Cell</i> (2010)                   |
| TCF3           | GSE11724         | Marson et al., <i>Cell</i> (2008)                      |
| NANOG          | GSE11724         | Marson et al., <i>Cell</i> (2008)                      |
| SOX2           | GSE11724         | Marson et al., <i>Cell</i> (2008)                      |
| OCT4           | GSE11724         | Marson et al., <i>Cell</i> (2008)                      |

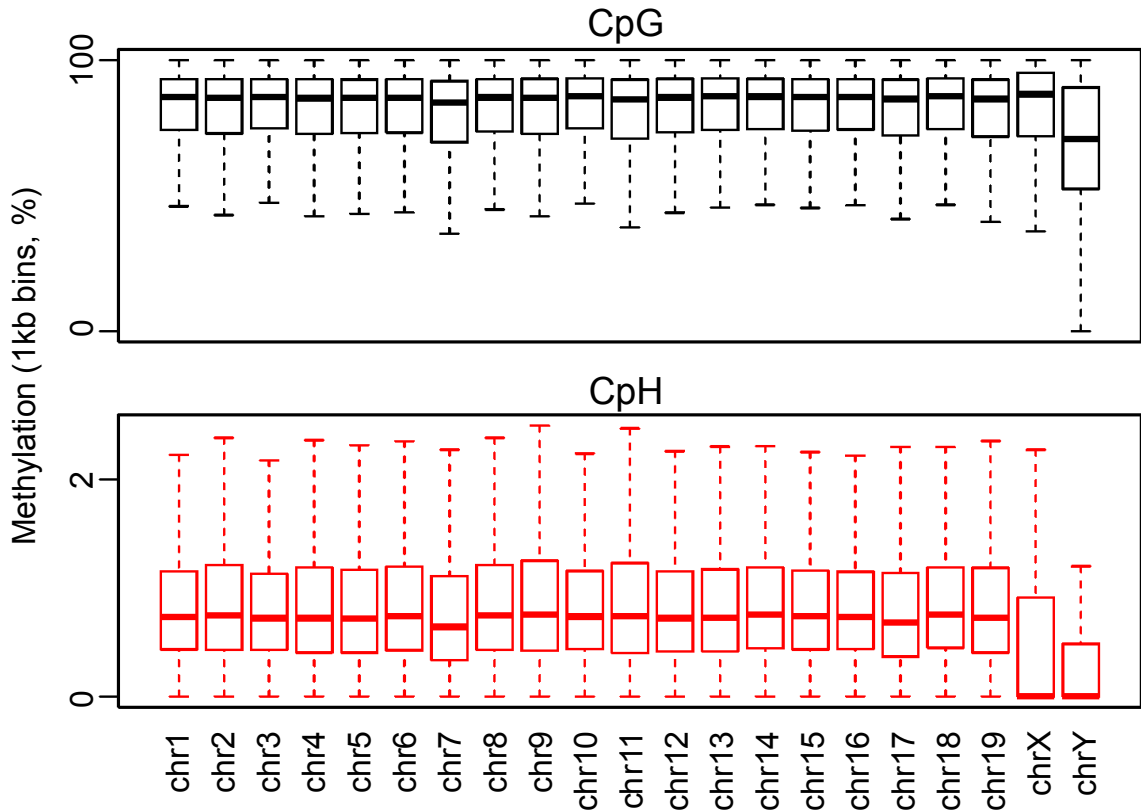

**Supplementary Figure 1. Global levels of CpG and CpH methylation across mouse chromosomes.** Interquartile boxplots of 1 Kb-bin-averaged methylation levels of each mouse chromosome are shown. Note that chrY shows lower levels of CpG methylation, whereas both sex chromosomes exhibit lower levels of CpH methylation.

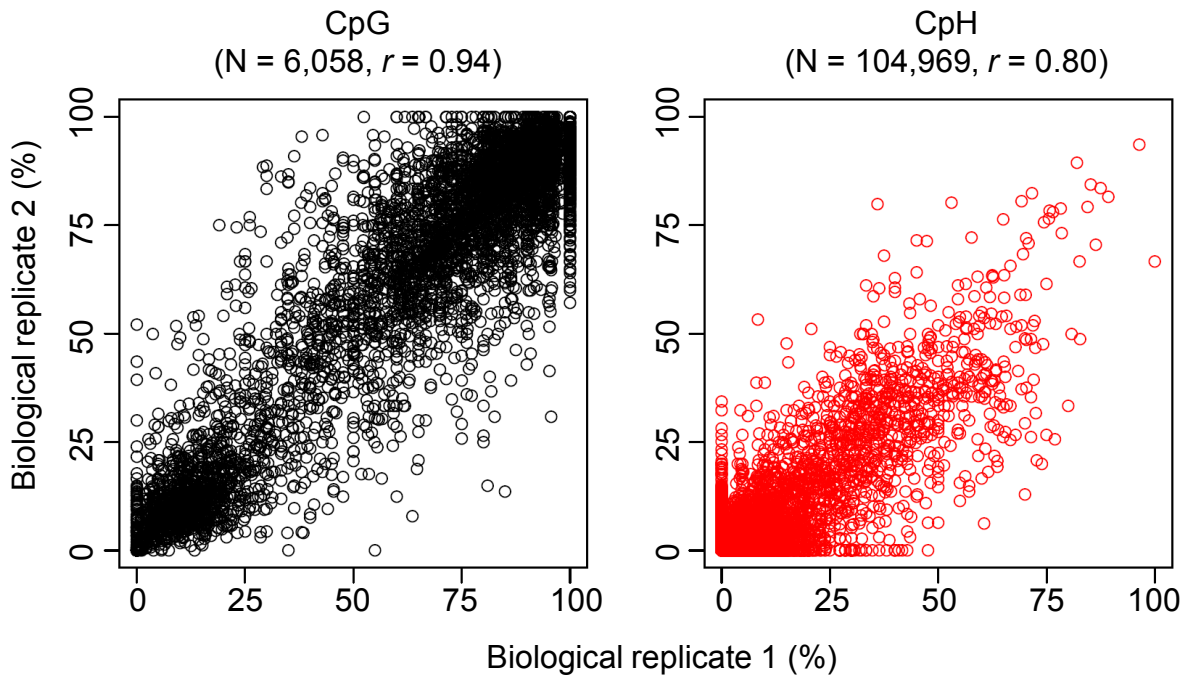

**Supplementary Figure 2. Inter-sample correlation of CpG and CpH methylation.**

Methylation levels of all individual CpG (left) and CpH (right) loci were compared between two biological replicates. Both classes of methylation exhibit high correlation between individuals. Pearson's correlation coefficients ( $r$ ) are shown.

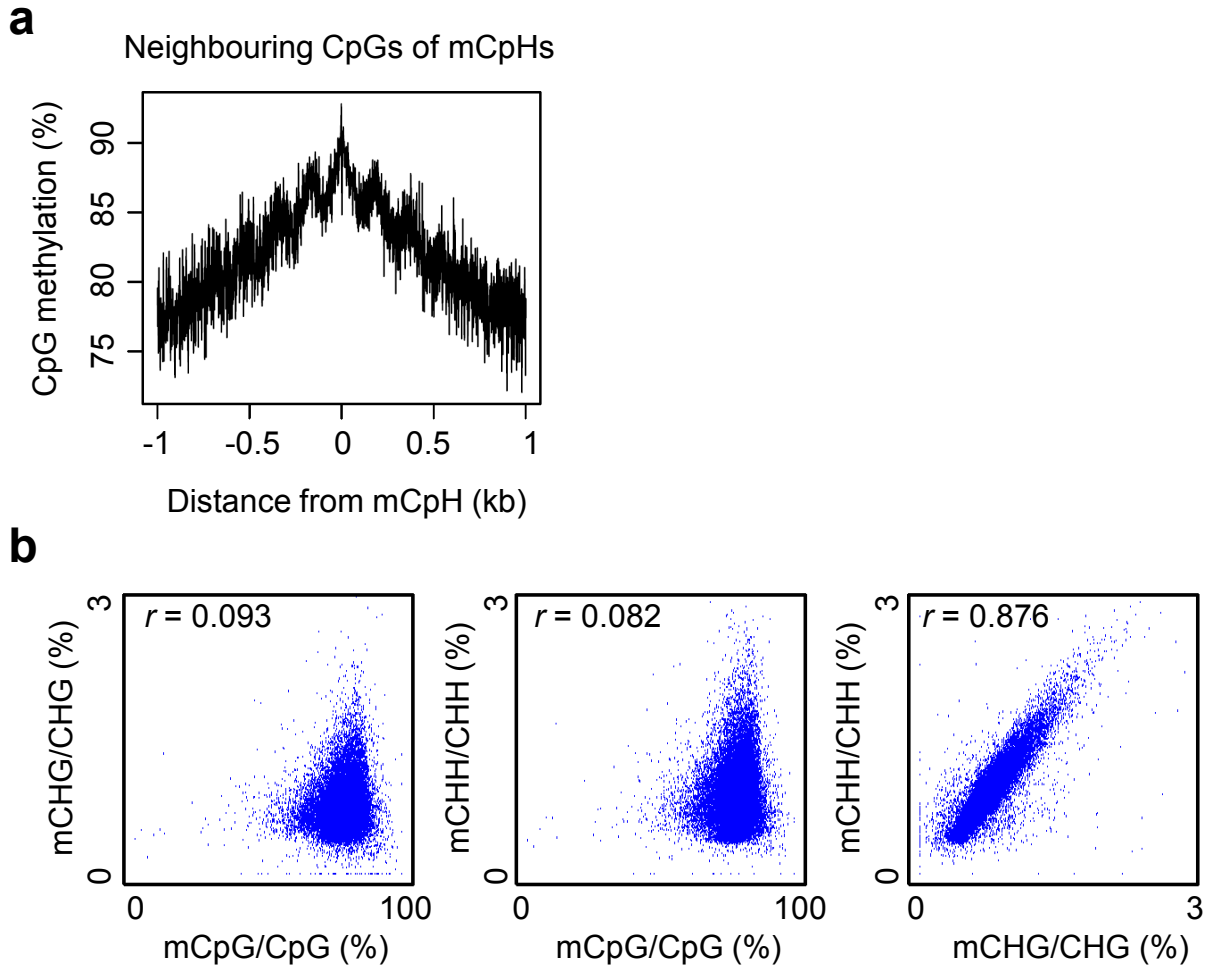

**Supplementary Figure 3. CpH methylation is spatially associated with CpG methylation.** (a) Methylation levels of neighboring CpGs of all mCpHs with  $\geq 20\%$  methylation. Note the anti-correlation between CpG methylation and its distance from mCpH. (b) Scatter plots of three classes of cytosine methylation. Pearson's correlations ( $r$ ) calculated using non-overlapping 100 Kb bins are shown.



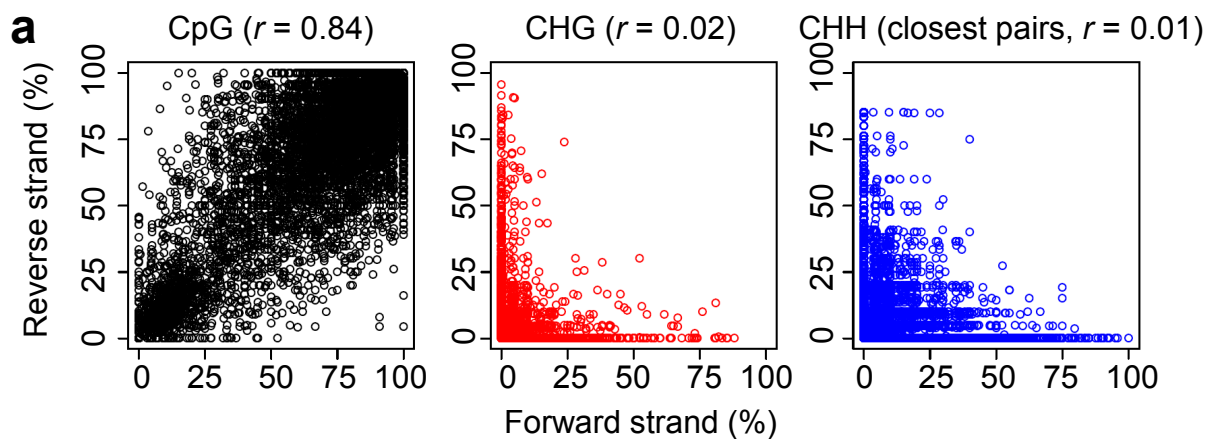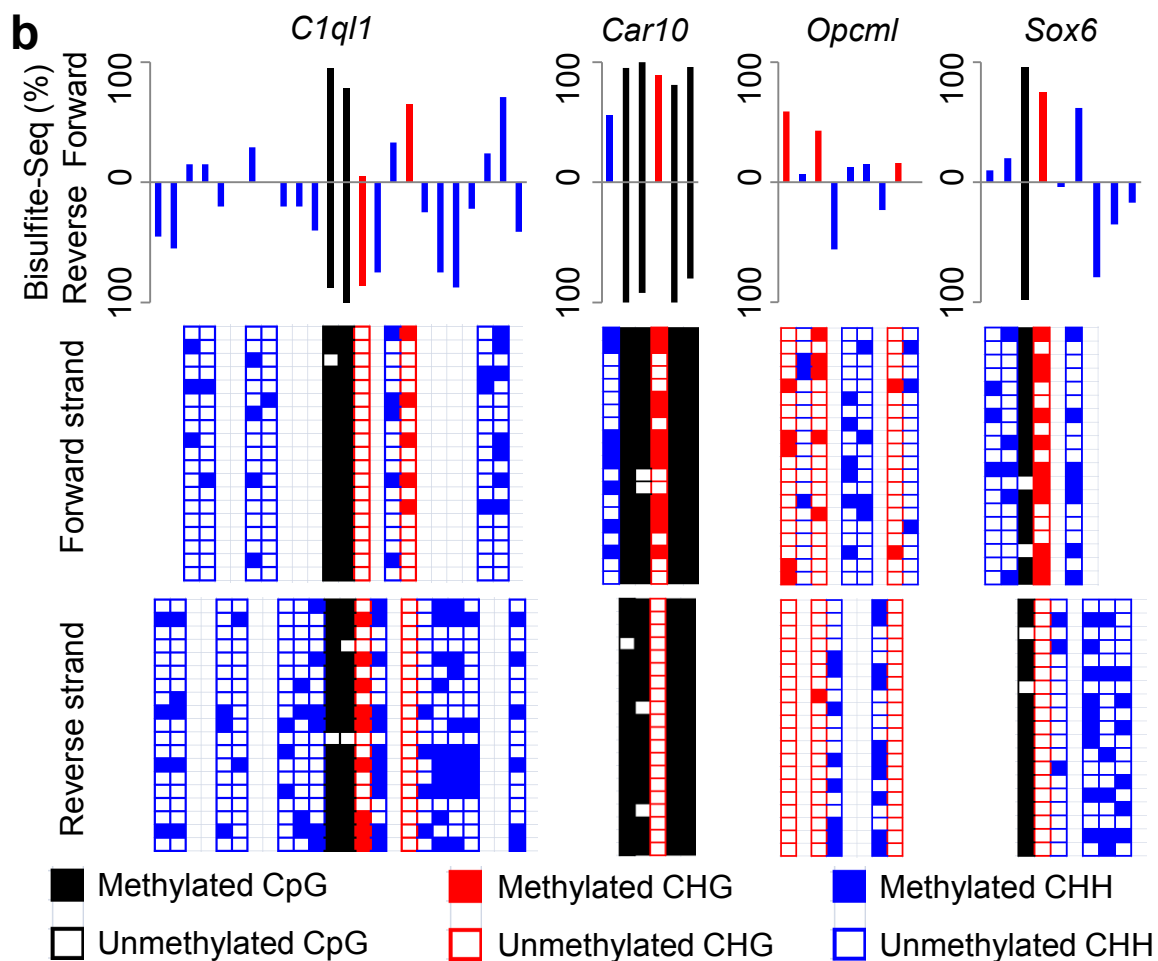

**Supplementary Figure 4. Mouse neuronal CpG and CpH methylation on two opposite DNA strands.** (a) Correlation between individual cytosines of three different classes. All top strand CpG and CHG loci were compared to the cytosines in the bottom strand within the motifs, whereas CHH loci were compared to the closest CHH in the opposite strand. Pearson's correlation coefficients are shown. (b) Bisulfite-Seq (top) and Sanger bisulfite sequencing (bottom) results of CpH methylated regions from both strands. Note that CpH methylation is present on both strands in most regions.

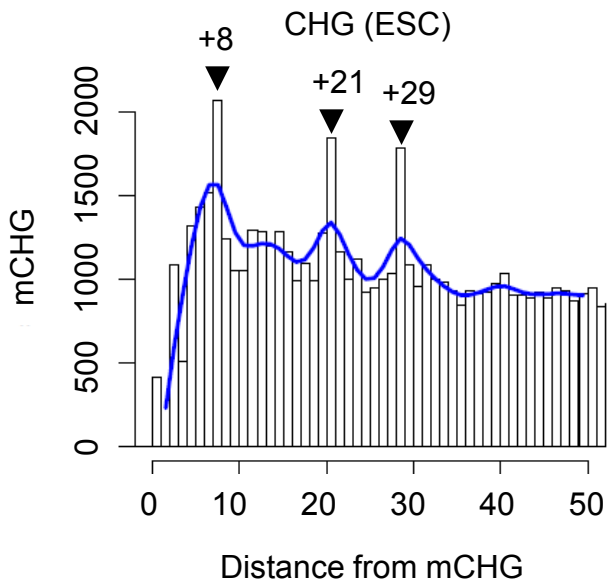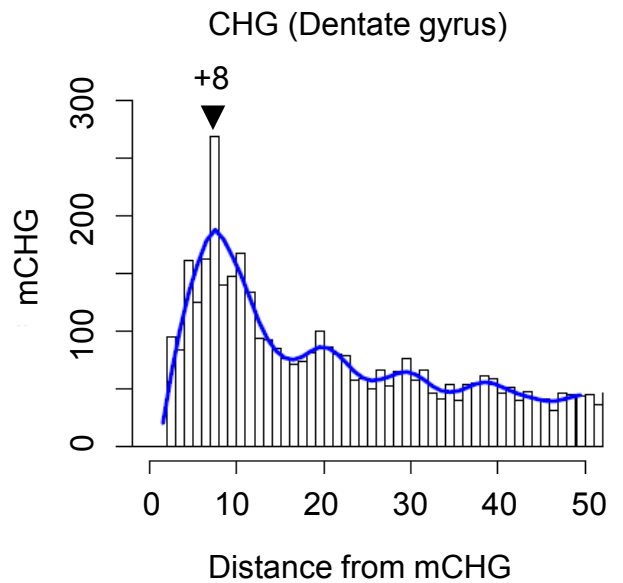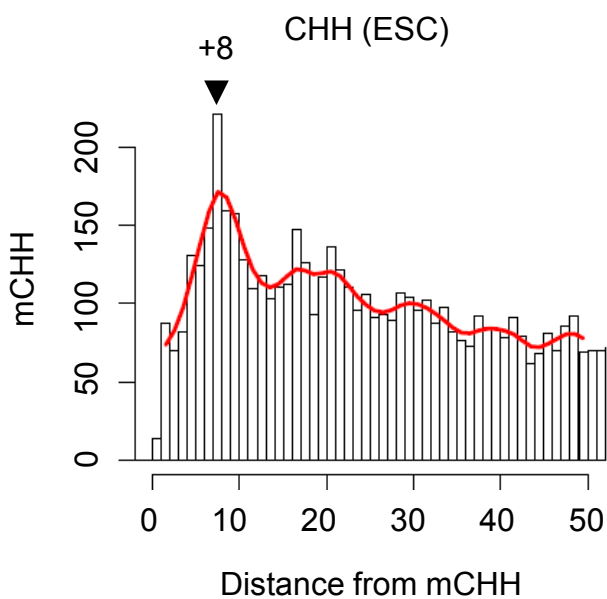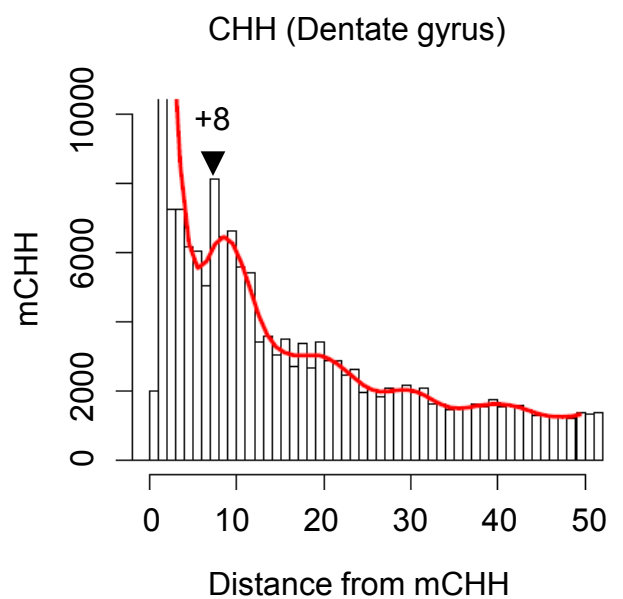

**Supplementary Figure 5. Distance analysis of CHG and CHH methylation.** Numbers of mCHG (top) and mCHH (bottom) are plotted against the base-pair distance from any mCHG/mCHH in H1 ESCs (left) and in the adult dentate gyrus (right). Note that only CHG methylation in ESCs exhibits the distinct 8, 21, 29 bp spacing pattern. Cubic spline smoothing curves are shown.

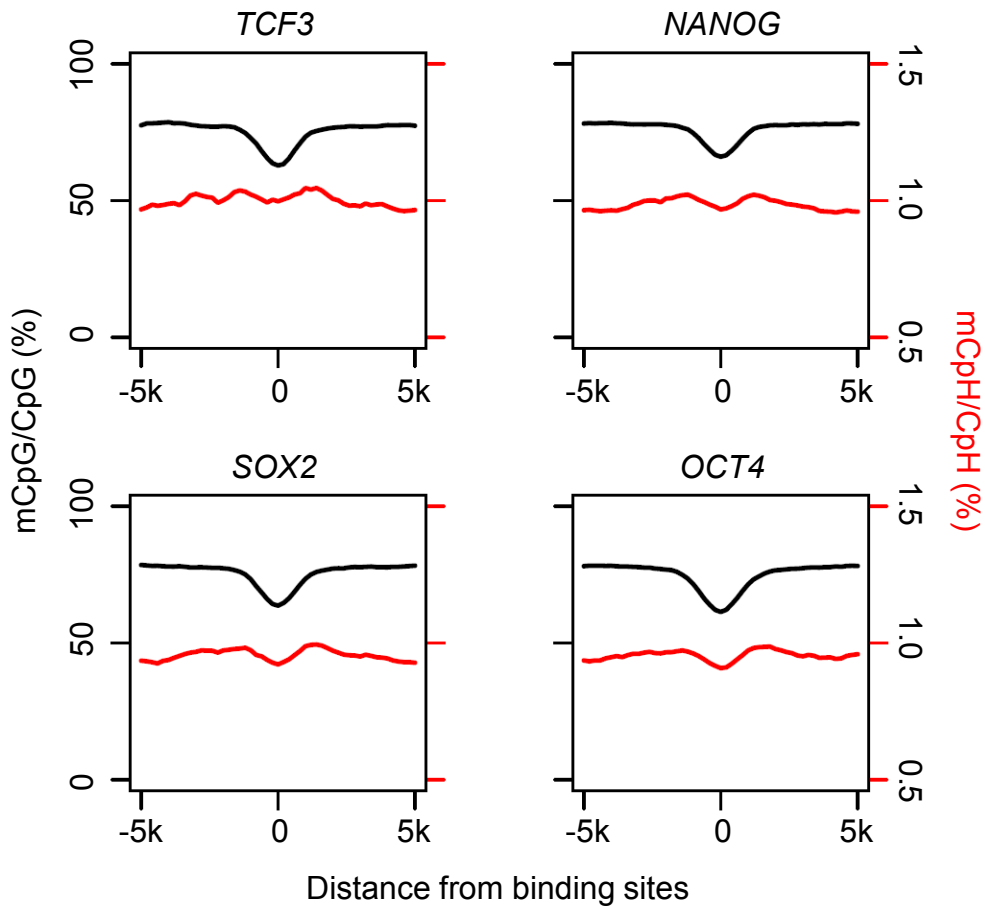

**Supplementary Figure 6. Neuronal CpG and CpH methylation around ESC-specific transcription factor binding sites.** CpG and CpH methylation levels were averaged across each of the four sets of ESC-specific transcription factor binding sites (Marson et al., *Cell* 2008). Note that CpH hypomethylation is much less pronounced than that around neuronal transcription factor binding sites (**Fig. 4a**). Modest hypomethylation is still observed because many of these binding sites map closely to TSSs, which are intrinsically hypomethylated.

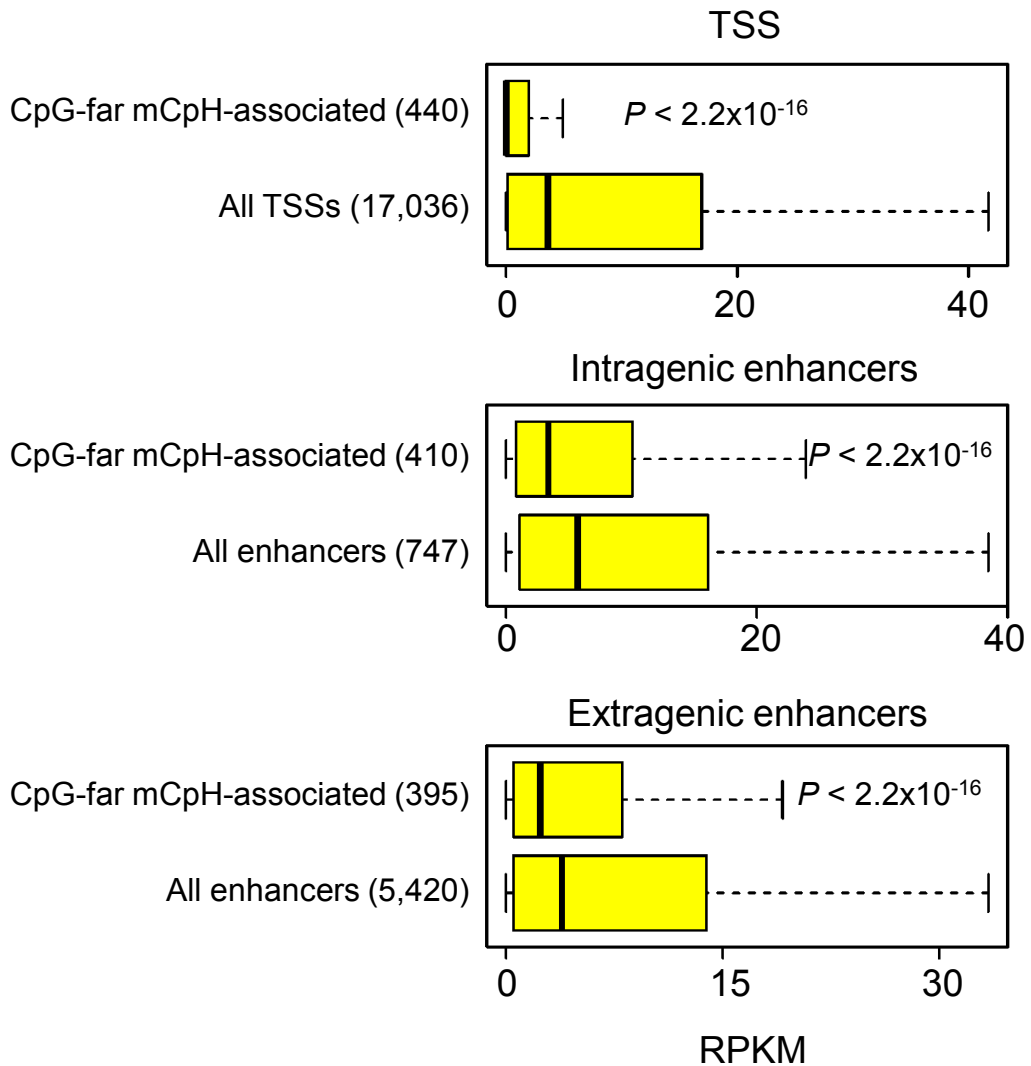

**Supplementary Figure 7. Anti-correlation between CpG-far CpH methylation in regulatory regions and gene expression.** 440, 410 and 395 of 70,364 mCpHs that do not have any CpG in their 500 bp flanking sequence are mapped within 2 kb from TSS, intragenic and extragenic enhancers (Kim et al., *Nature* 2010), respectively. These mCpH-containing regulatory regions exhibit lower nearest gene expression levels ( $P$  values are indicated; Mann-Whitney U-tests).

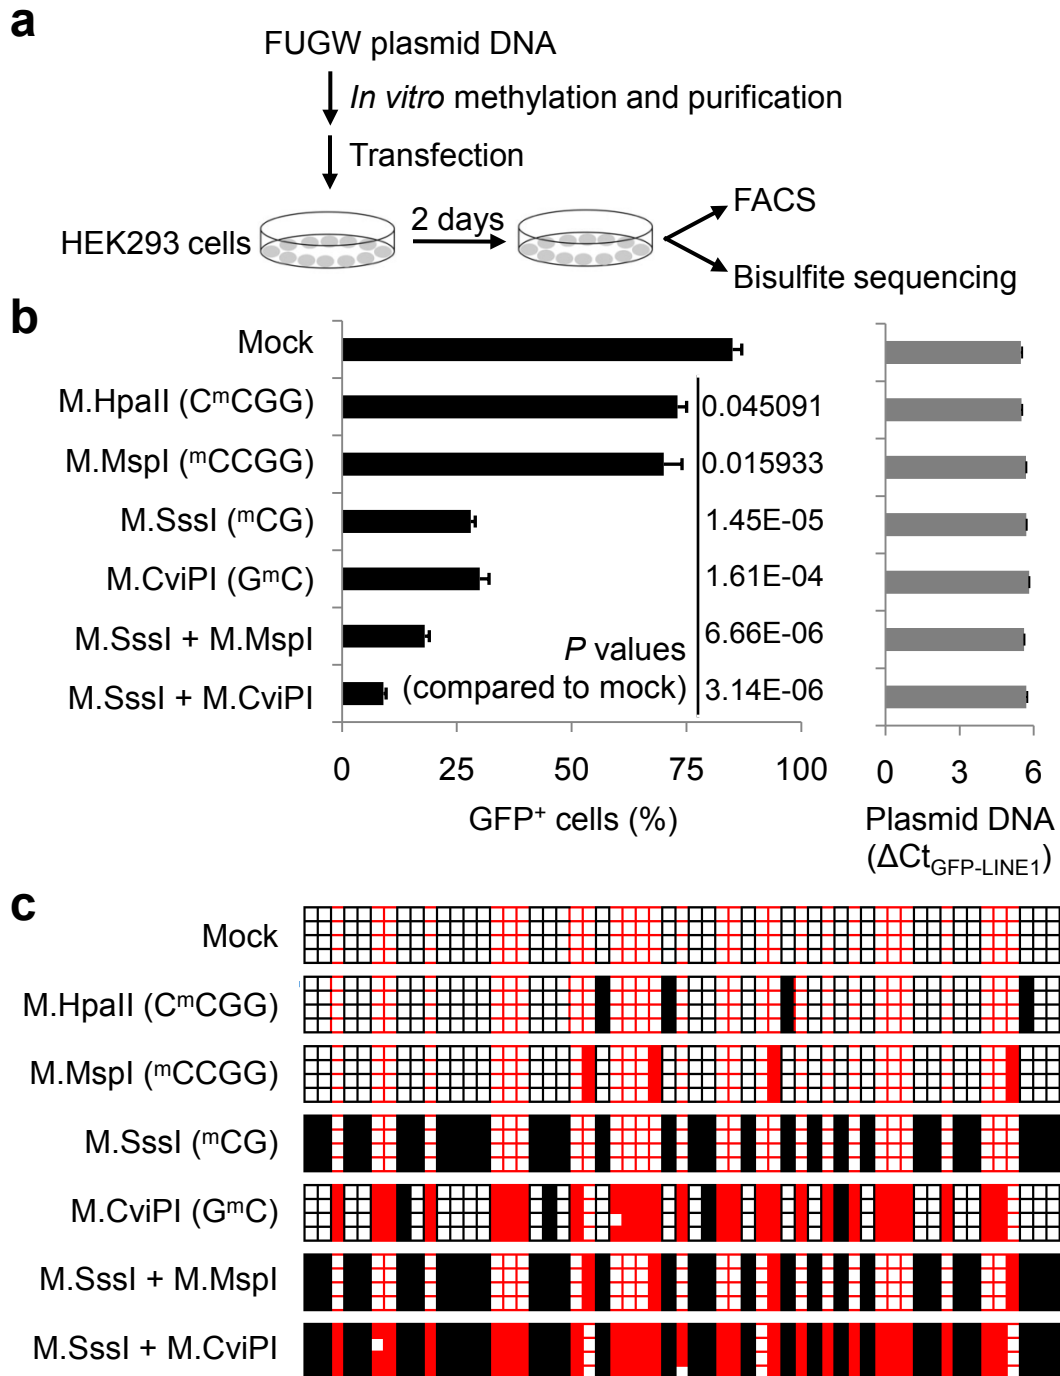

**Supplementary Figure 8. *In vitro* methylated reporter assay in HEK293 cells.**

(a) A schematic illustration of experimental design. (b) FACS results (left) of GFP<sup>+</sup> cells for each *in vitro* methylated reporter. *In vitro* methylation does not alter transfection efficiencies as measured by qPCR (right). Values represent mean  $\pm$  s.e.m. (P values are indicated, ANOVA). (c) Methylation patterns were determined by bisulfite sequencing of plasmids recovered 2 days after transfection.

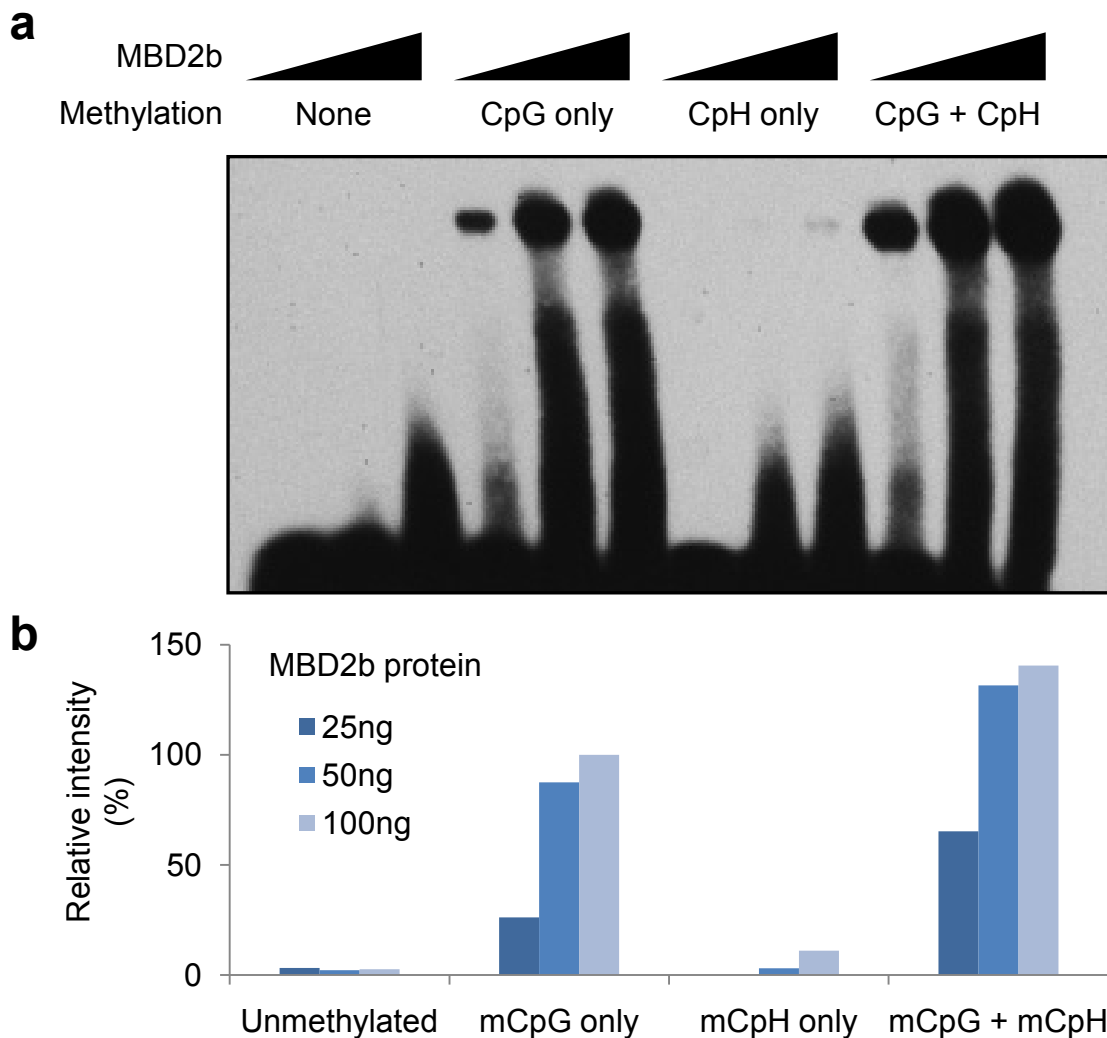

**Supplementary Figure 9. Effects of CpH methylation on MBD2b-DNA interaction. (a)** An EMSA experiment using different amounts of recombinant MBD2b proteins and the same set of synthetically methylated oligos as in **Fig. 6b**. **(b)** Quantification of MBD2b-bound oligos. Note that MBD2b exhibits higher selectivity towards mCpGs than MeCP2 does (**Fig. 6b**).

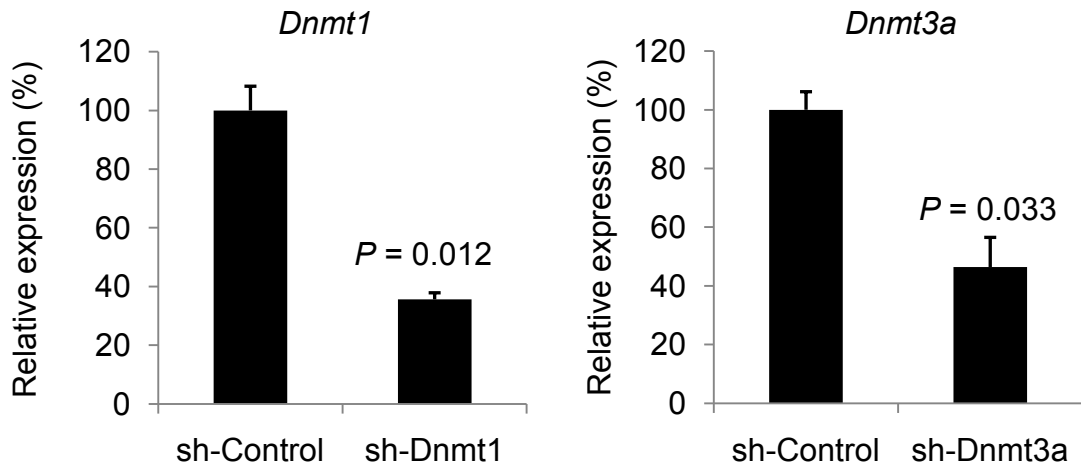

**Supplementary Figure 10. Knock-down efficiency of shRNAs.** AAVs expressing shRNAs targeting *Dnmt1* (left) or *Dnmt3a* (right) or control AAVs expressing a scrambled shRNA were injected into the adult mouse dentate gyrus. Knock-down efficiency was determined by qPCR using *Dnmt1*- or *Dnmt3a*-specific primers. Values represent mean  $\pm$  s.e.m. (n = 3; P values are indicated; Student's t-test).

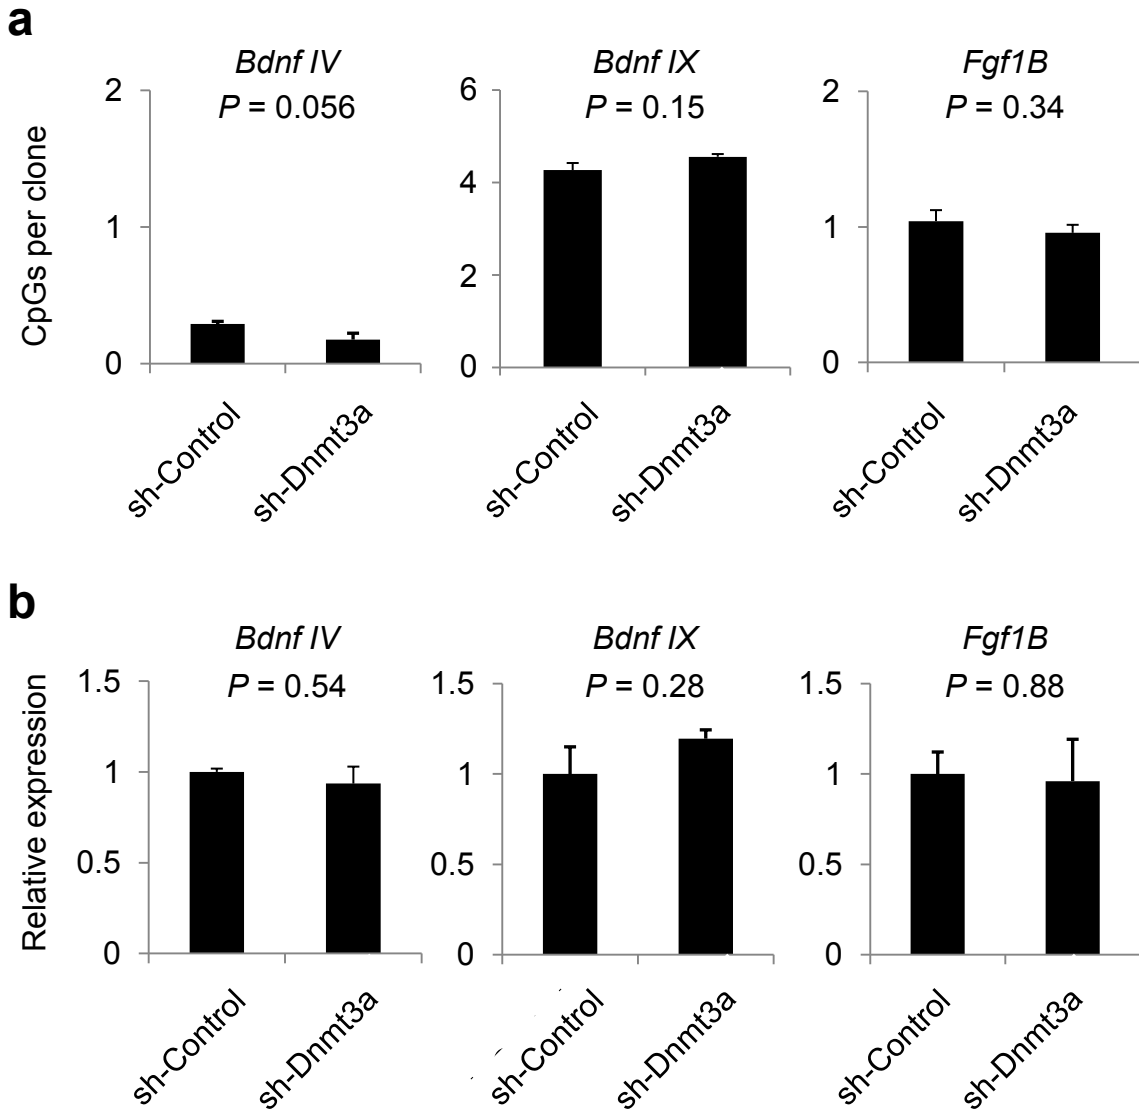

**Supplementary Figure 11. Lack of effects of DNMT3A knock-down on unmethylated and CpG-methylated CpH-unmethylated regions.** (a) Methylation levels of *Bdnf IV* (unmethylated, left), *Bdnf IX* (CpG-methylated/CpH-unmethylated, middle) and *Fgf1B* (CpG-methylated/CpH-unmethylated, right) promoters after DNMT3A knock-down. (b) Expression levels of *Bdnf IV*, *Bdnf IX* and *Fgf1B* transcripts after DNMT3A knock-down (*P* values are indicated; Student's *t*-tests).



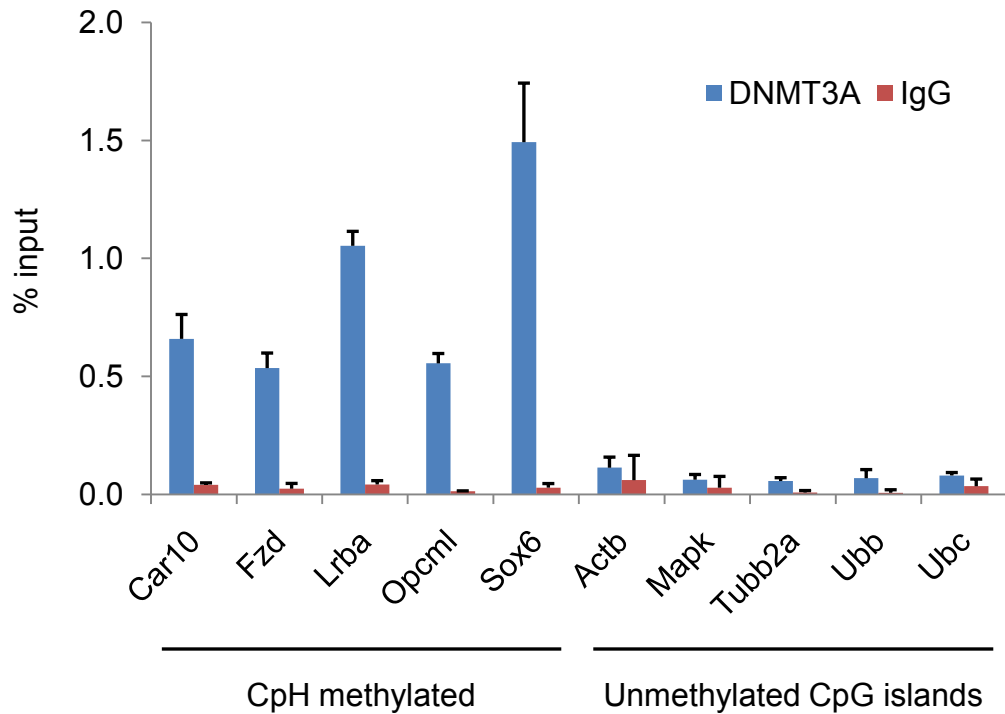

**Supplementary Figure 12. DNMT3A binds to CpH-methylated regions in adult dentate gyrus *in vivo*.** Occupancy of DNMT3A in CpH-methylated regions, measured by the fraction of input neuronal chromatin immuno-precipitated by a DNMT3A antibody, was compared to unmethylated CpG island regions. A rabbit IgG antibody was used to control for unspecific binding.

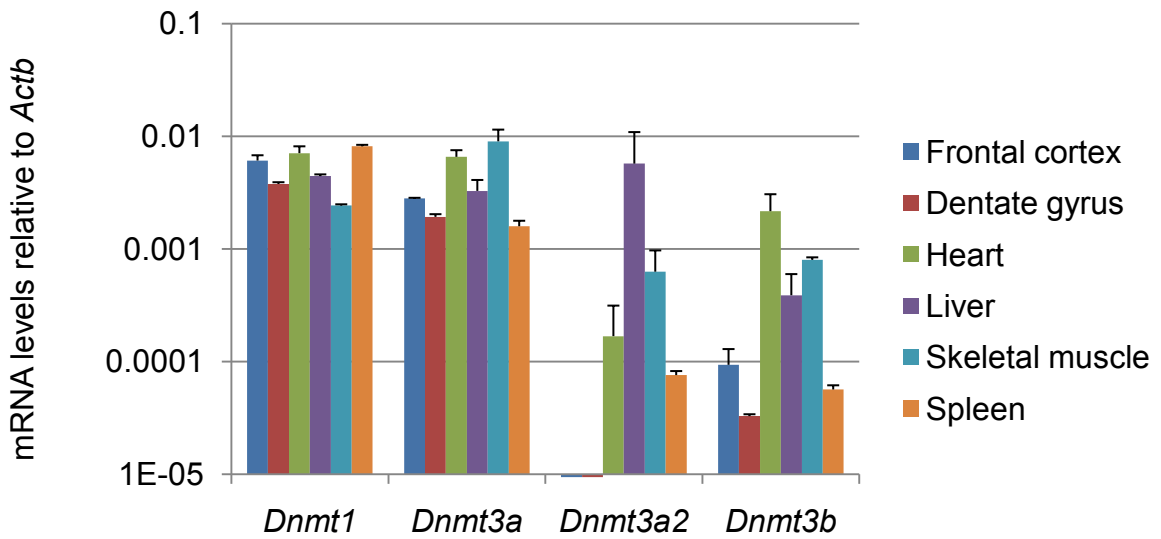

**Supplementary Figure 13. *Dnmt* gene expression in adult mouse tissues.** *Dnmt* gene expression was measured by RT-qPCR in multiple adult mouse tissues. Note that the adult brain expresses a similar level of *Dnmt1* and *Dnmt3a*, a lower level of *Dnmt3b* compared to other tissues, and no *Dnmt3a2*. Values represent mean  $\pm$  s.e.m. (n = 3).

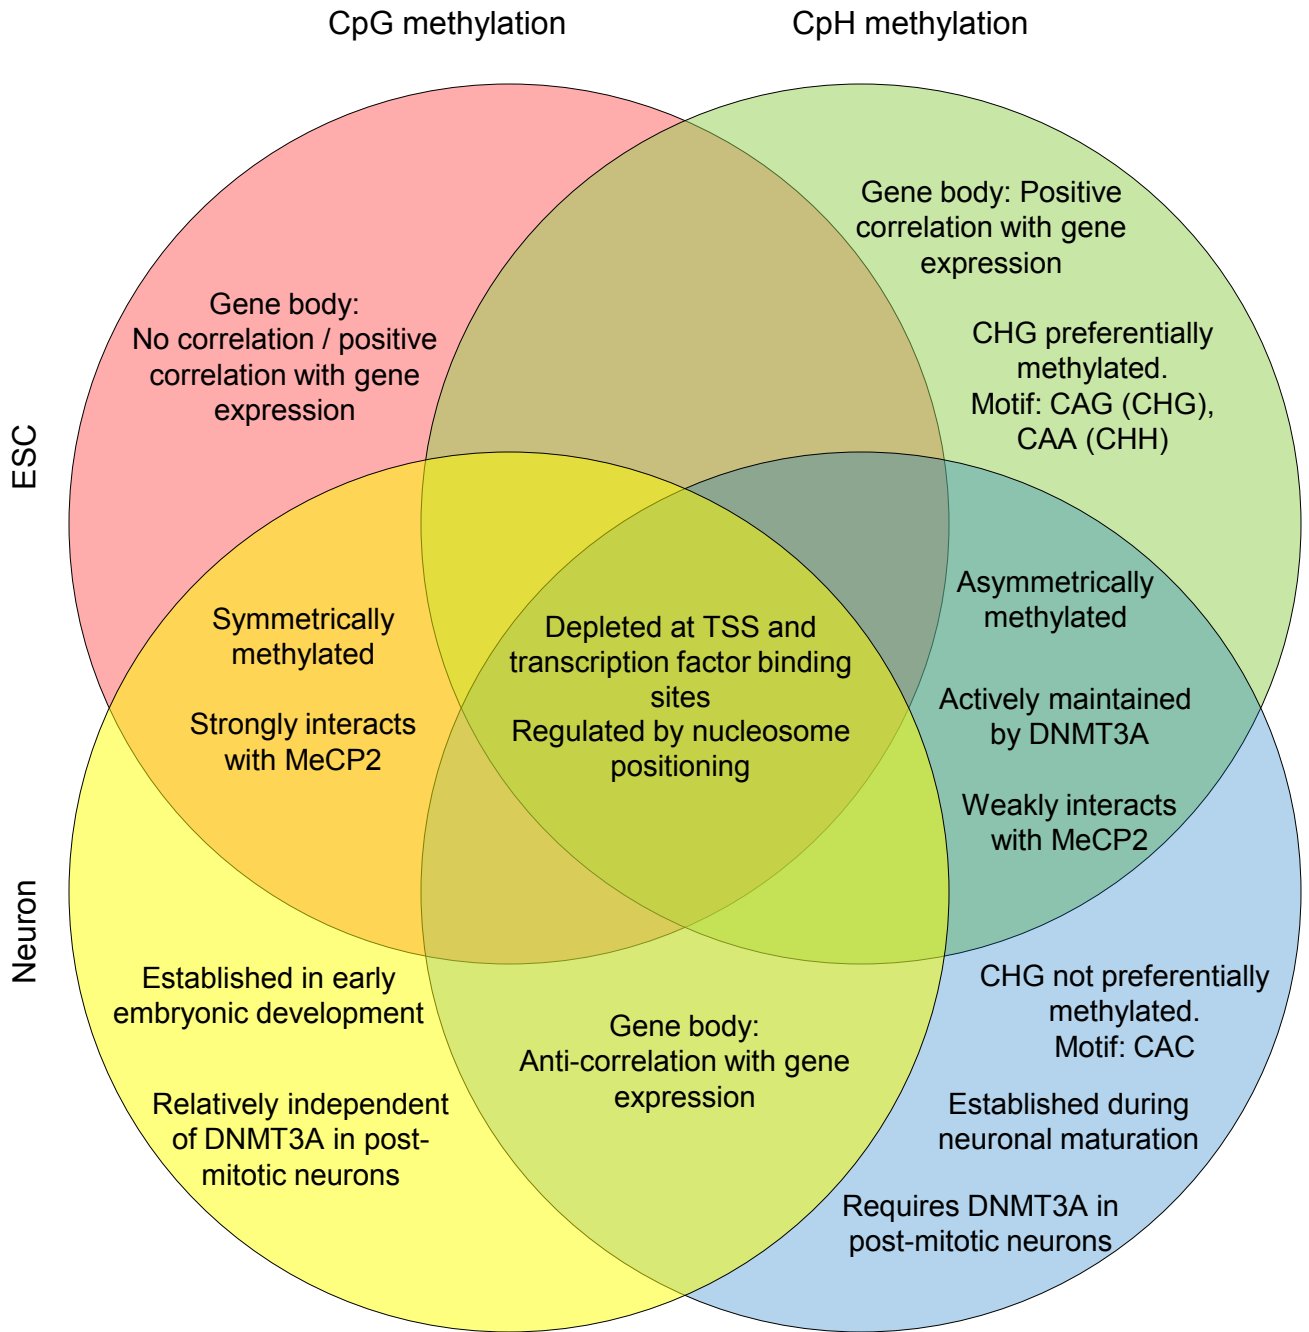

**Supplementary Figure 14. Summary of similarities and differences between CpG and CpH methylation in ESCs *in vitro* and neurons *in vivo*.**
